# Supplementary figures and images for: Hyaluronic acid fuels pancreatic cancer cell growth
Source: eLife journal article supplement (doi:10.7554/elife.62645), 2021-12-23

# FIGURE 1—FIGURE SUPPLEMENT 1

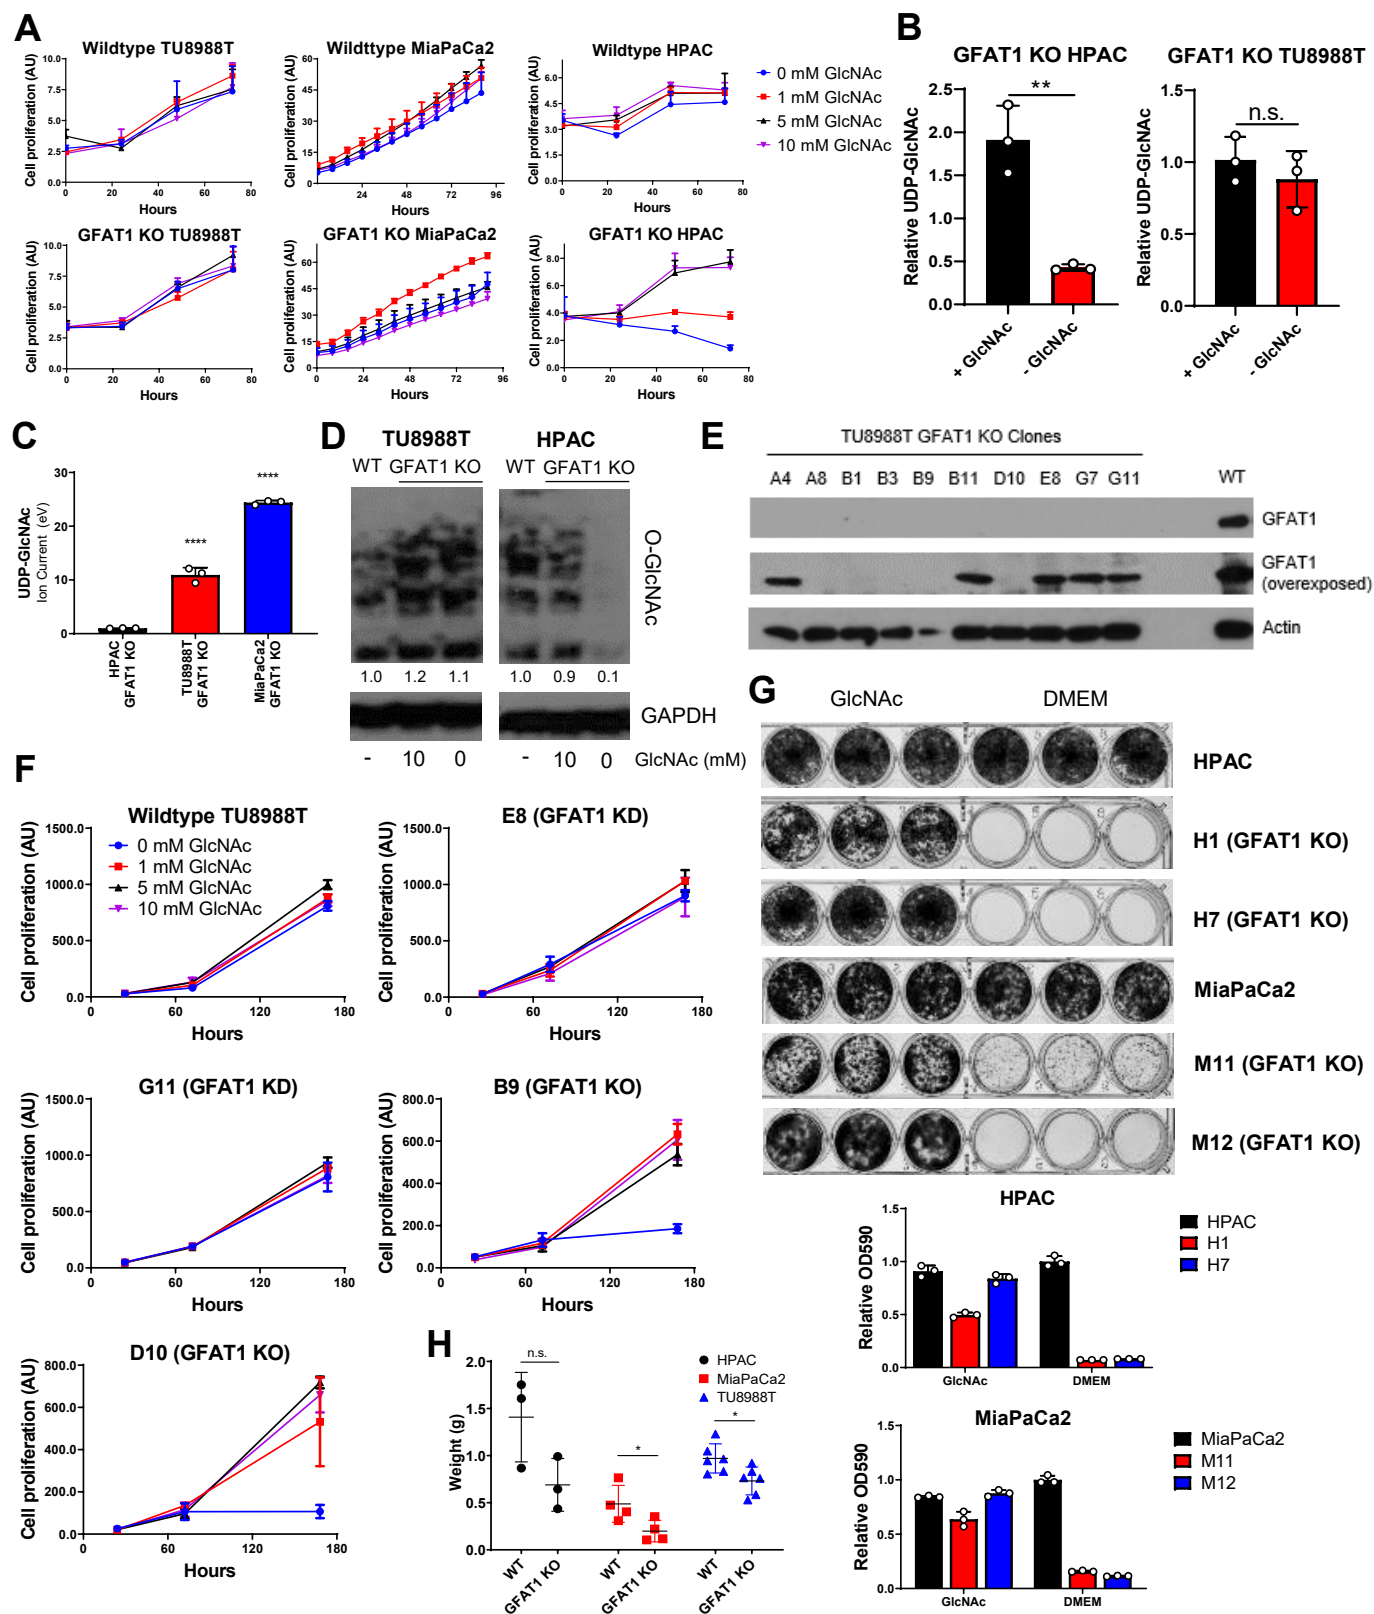

Supplement: supp [file elife-62645-supp-v1.zip]

# FIGURE 3—FIGURE SUPPLEMENT 2

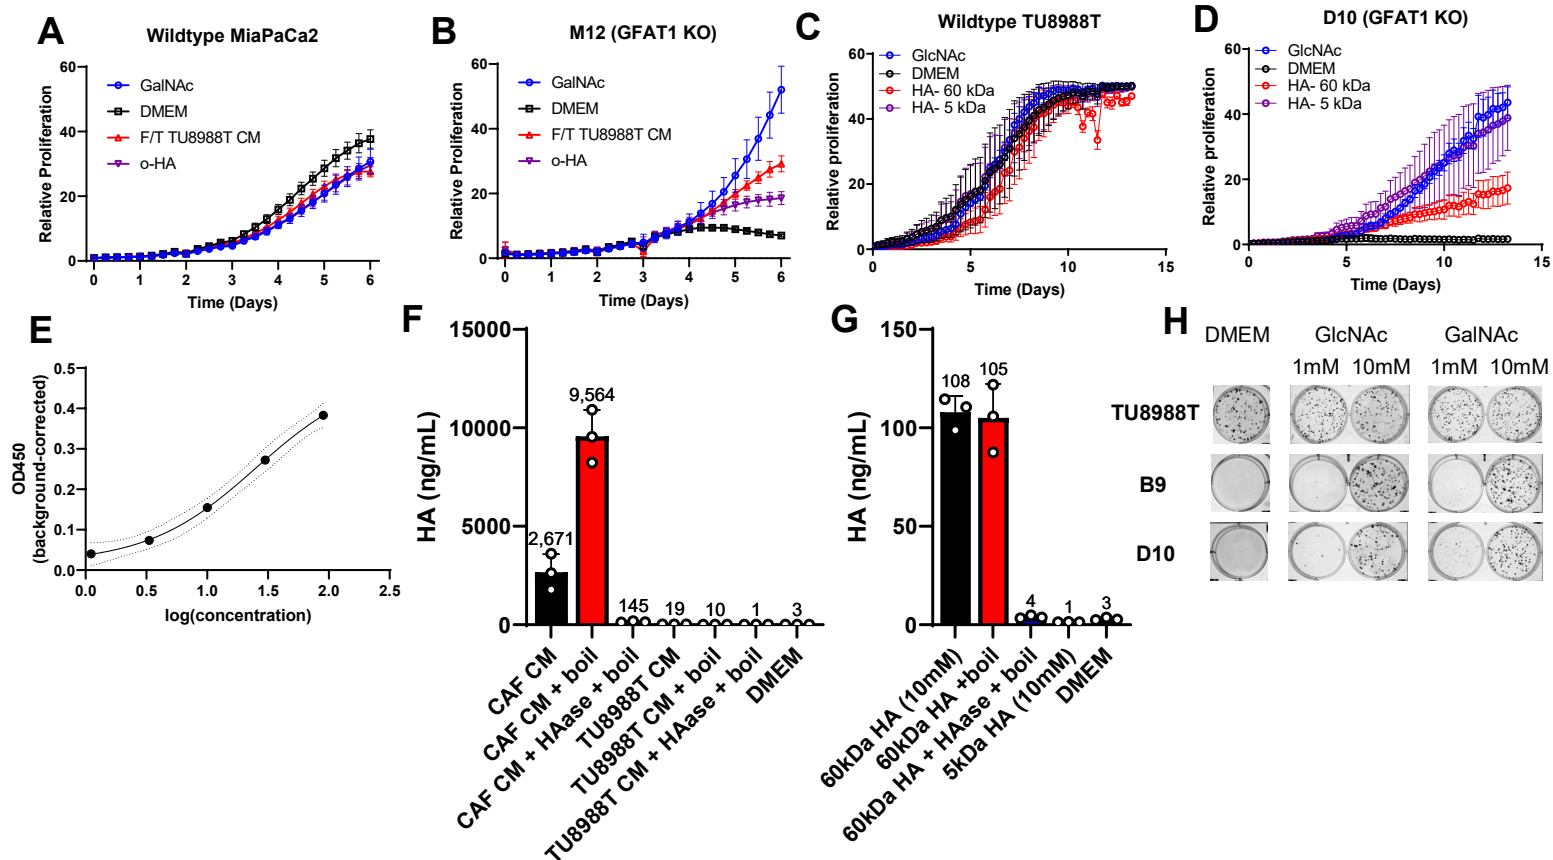

Supplement: supp [file elife-62645-supp-v1.zip]

# FIGURE 3—FIGURE SUPPLEMENT 1

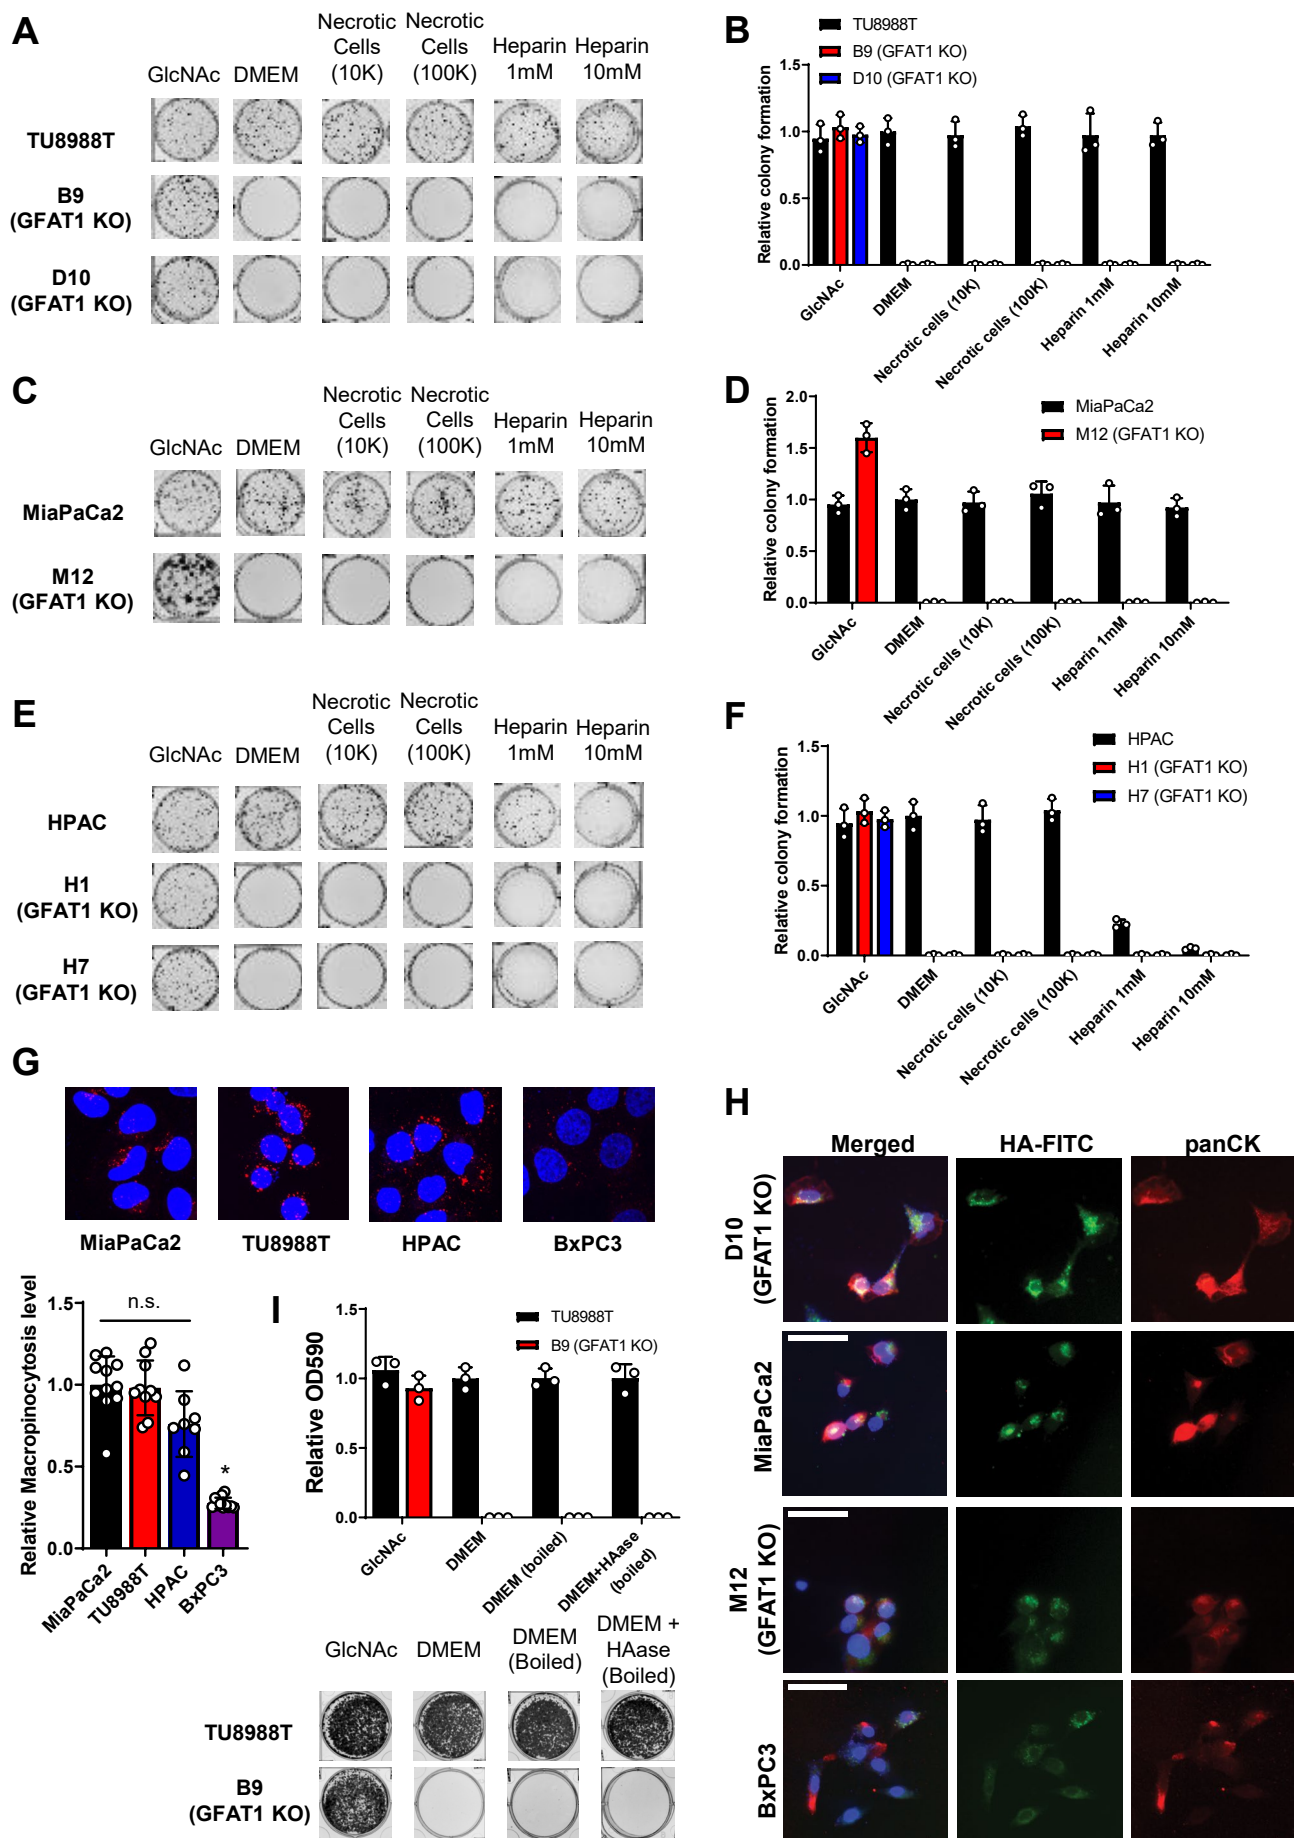

Supplement: supp [file elife-62645-supp-v1.zip]

# FIGURE 2—FIGURE SUPPLEMENT 1

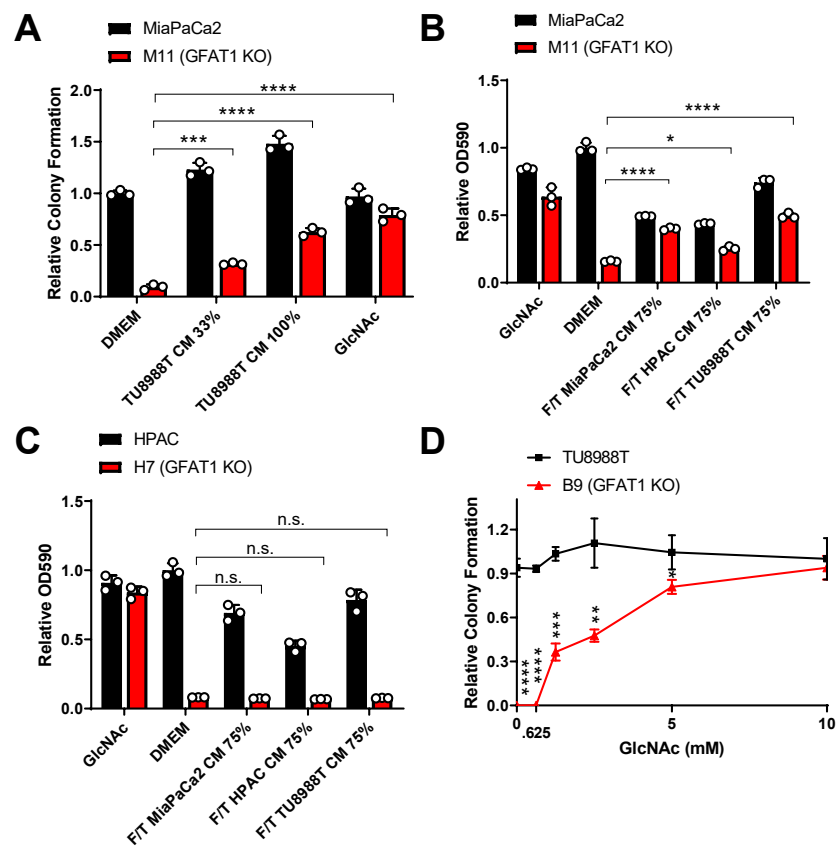

Supplement: supp [file elife-62645-supp-v1.zip]

# FIGURE 5—FIGURE SUPPLEMENT 1

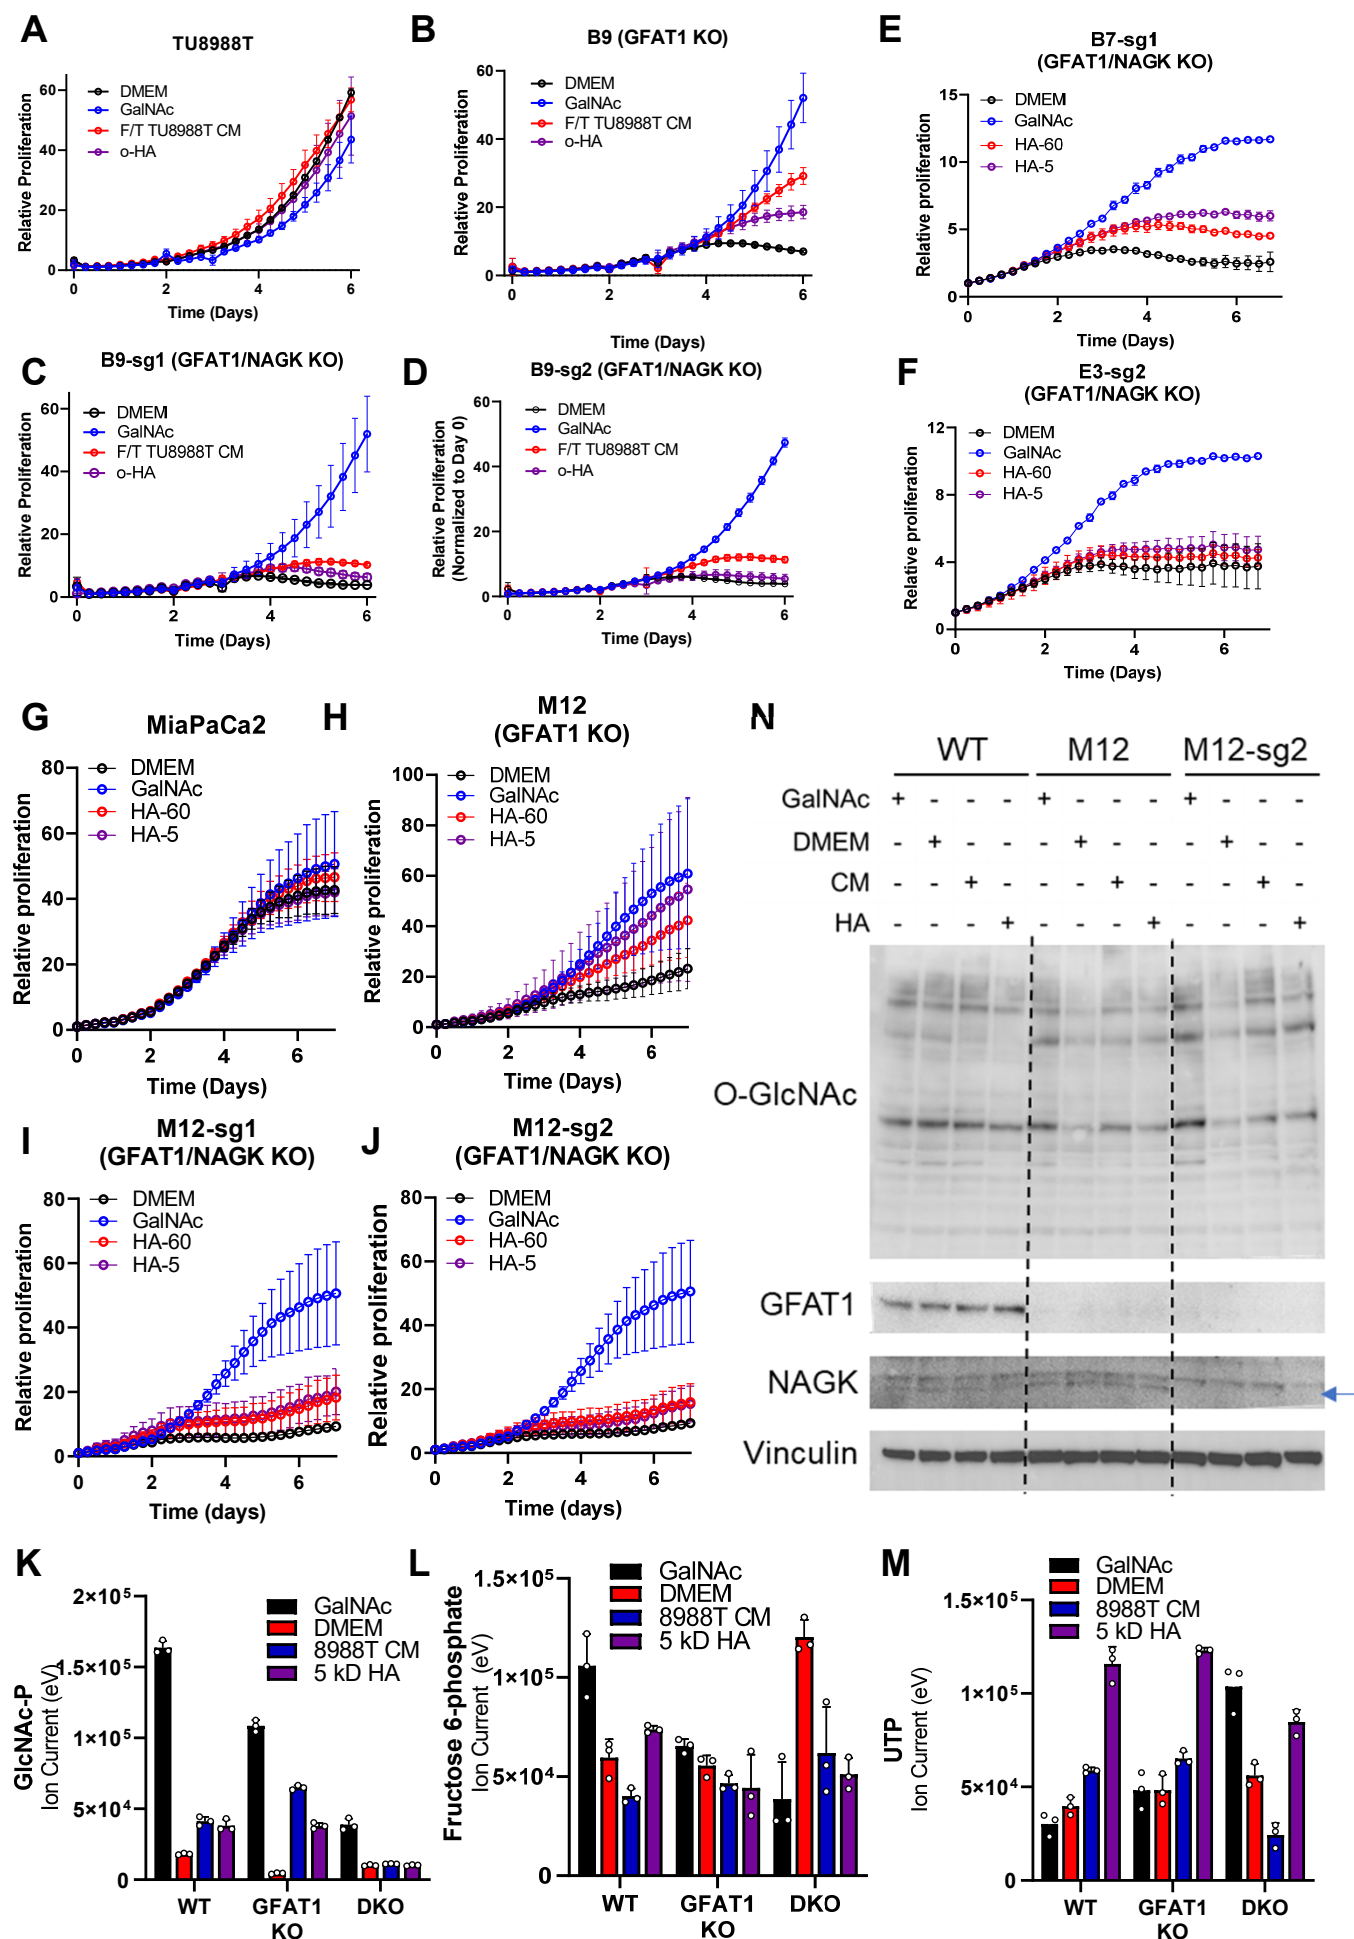

Supplement: supp [file elife-62645-supp-v1.zip]
